# Supplementary material
Source: publisher site journal article supplement (https://www.dovepress.com/article/298579)
Supplement: Supplementary file 1 [file get_supplementary_file.php]

**Table S1 Basic characteristics of enrolled patients**

| **Characteristics** | **Enrolled patients n, (%)** |
| --- | --- |
| **Age (range), years** | 59.4 (31.0-83.0) |
| 60 | 114 (52.8%) |
| 60 | 102 (47.2%) |
| **Gender** |  |
| Male | 91 (42.1%) |
| Female | 125 (57.9%) |
| **Smoking history** |  |
| smoker | 37 (17.1%) |
| Non-smoker | 179 (82.9%) |
| **Histological subtype** |  |
| AD | 209 (96.8%) |
| SCC | 2 (0.9%) |
| Adenosquamous cell carcinoma | 4 (1.8%) |
| Large cell carcinoma | 1 (0.5%) |
| **ECOG PS** |  |
| 0 | 102 (47.2%) |
| 1 | 110 (50.9%) |
| 2 | 4 (1.9%) |
| ***EGFR* mutation** |  |
| Common |  |
| Exon 19 deletion | 112 (51.9%) |
| Exon 21 L585R | 99 (45.8%) |
| Uncommon |  |
| Exon 18 G719X | 2 (0.9%) |
| Exon 18 G719A | 2 (0.9%) |
| Exon 18 G719C | 1 (0.5%) |
| **Liver metastasis** |  |
| Presence | 19 (8.8%) |
| Absence | 197 (91.2%) |
| **Adrenal metastasis** |  |
| Presence | 10 (4.6%) |
| Absence | 206 (95.4%) |
| **Peritoneal metastasis** |  |
| Presence | 2 (0.9%) |
| Absence | 214 (99.1%) |
| **Leptomeningeal metastases** |  |
| Presence | 4 (1.9%) |
| Absence | 212 (98.1%) |
| **Brain parenchyma metastasis** |  |
| Presence | 59 (27.3%) |
| Absence | 147 (72.7%) |
| **Pericardial metastasis** |  |
| Presence | 6 (2.8%) |
| Absence | 210 (97.2%) |
| **Extrathoracic lymph node metastasis** |  |
| Presence | 52 (24.1%) |
| Absence | 164 (75.9%) |
| **Lung metastasis (contralateral)** |  |
| Presence | 91 (42.1%) |
| Absence | 125 (57.9%) |
| **Pleural metastasis** |  |
| Presence | 71 (32.9%) |
| Absence | 145 (67.1%) |
| **Bone metastasis** |  |
| Presence | 97 (44.9%) |
| Absence | 119 (55.1%) |
| **Metastasis to other organs** |  |
| Presence | 7 (3.2%) |
| Absence | 209 (96.8%) |
| **Number of organs with metastasis** |  |
| Single-organ | 96 (44.4%) |
| Multi-organ | 120 (55.6%) |
| **Total patients** | **216** |

ECOG PS: Eastern Cooperative Oncology Group Performance Status at diagnosis.

**Table S2 Basic characteristics in patients harboring *EGFR* deletions in exon 19 and L858R point mutations in exon 21**

| **Characteristics** | **Patients with exon 19 deletions, n** | **Patients with exon 21 L858R, n** | **p-value** |
| --- | --- | --- | --- |
| **Age (range), years** | 58.8 (31.0-83.0) | 59.6 (36.0-80.0) | 0.6133 |
| 60 | 55 (49.1%) | 54 (54.5%) | 0.4906 |
| 60 | 57 (50.9%) | 45 (45.5%) |  |
| **Gender** |  |  | 0.7801 |
| Male | 48 (42.9%) | 40 (40.4%) |  |
| Female | 64 (57.1%) | 59 (49.6%) |  |
| **Smoking history** |  |  | 0.7167 |
| Current smoker | 18 (16.1%) | 18 (18.2%) |  |
| Non-smoker | 94 (83.9%) | 81 (81.8%) |  |
| **ECOG PS** |  |  | 0.8973 |
| 0 | 51 (45.5%) | 48 (48.5%) |  |
| 1 | 59 (52.7%) | 49 (49.5%) |  |
| 2 | 2 (1.8%) | 2 (2.0%) |  |
| **Liver metastasis** |  |  | 1.000 |
| Presence | 10 (8.9%) | 9 (9.1%) |  |
| Absence | 102 (90.1%) | 90 (90.9%) |  |
| **Adrenal metastasis** |  |  | 0.7528 |
| Presence | 6 (5.4%) | 4 (4.0%) |  |
| Absence | 106 (94.6%) | 95 (96.0%) |  |
| **Peritoneal metastasis** |  |  | 0.4995 |
| Presence | 2 (1.8%) | 0 (0%) |  |
| Absence | 110 (98.2%) | 99(100.0%) |  |
| **Leptomeningeal Metastases** | |  | 1.000 |
| Presence | 2 (1.8%) | 2 (2.0%) |  |
| Absence | 110 (98.2%) | 97 (98.0%) |  |
| **Brain parenchyma metastasis** |  |  | 1.000 |
| Presence | 31 (27.7%) | 28 (28.3%) |  |
| Absence | 81 (72.3%) | 71 (71.7%) |  |
| **Pericardial metastasis** |  |  | 0.4225 |
| Presence | 2 (1.8%) | 4 (4.0%) |  |
| Absence | 110 (98.2%) | 95 (96.0%) |  |
| **Pleural metastasis** |  |  | 0.5599 |
| Presence | 35 (31.3%) | 35 (35.4%) |  |
| Absence | 77 (68.7%) | 64 (64.6%) |  |
| **Extrathoracic lymph node metastasis** | | | 0.3373 |
| Presence | 31 (27.7%) | 21 (21.2%) |  |
| Absence | 81 (72.3%) | 78 (78.8%) |  |
| **Lung metastasis (contralateral)** | | | 0.4024 |
| Presence | 43 (38.4%) | 44 (44.4%) |  |
| Absence | 69 (61.6%) | 55 (55.6%) |  |
| **Bone metastasis** |  |  | 0.4914 |
| Presence | 53 (47.3%) | 42 (42.4%) |  |
| Absence | 59 (52.7%) | 57 (57.6%) |  |
| **Metastasis to other organs** | |  | 0.7084 |
| Presence | 3 (2.7%) | 4 (4.0%) |  |
| Absence | 109 (97.3%) | 95 (96.0%) |  |
| **Number of organs with metastasis** | | | 0.6769 |
| Single-organ | 47 (42.0%) | 45 (45.5%) |  |
| Multi-organ | 65 (58.0%) | 54 (54.5%) |  |
| **Total patients** | **112** | **99** |  |

ECOG PS: Eastern Cooperative Oncology Group Performance Status at diagnosis.

**Figure S1**


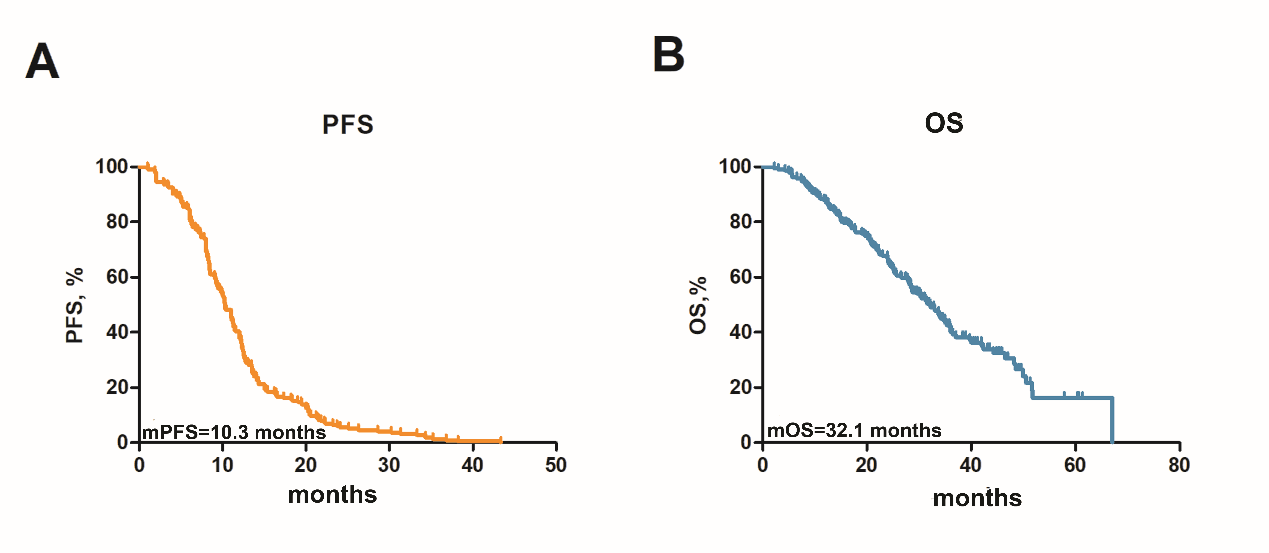


**Figure S1:** Survival outcomes of the cohort. (A), Kaplan-Meier curves of the progression-free survival (PFS) of the cohort. The median PFS of patients was 10.3 months. (B) Kaplan-Meier curves of the overall survival (OS) of the cohort. The median OS of patients was 32.1 months.

**Figure S2**


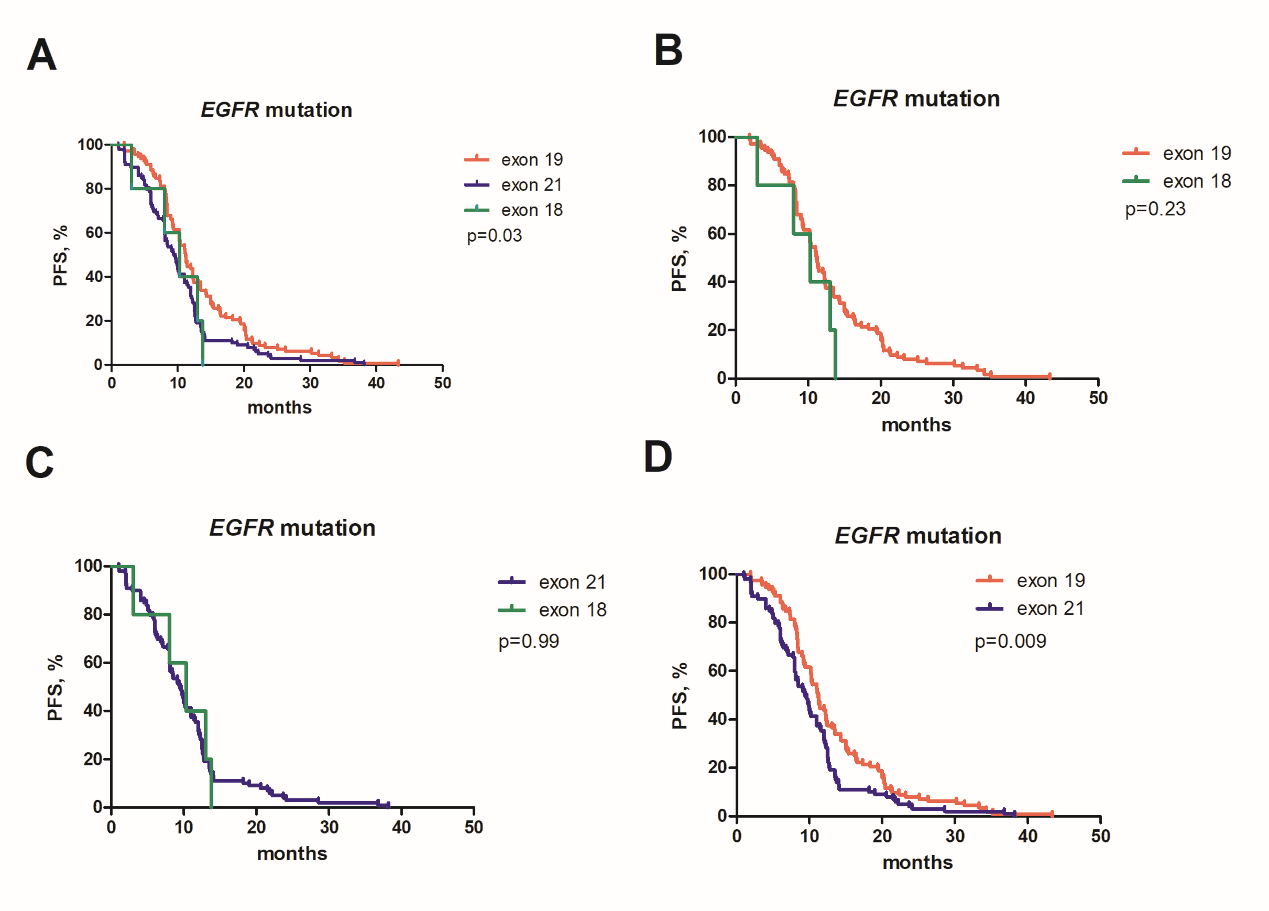


**Figure S2:** Kaplan-Meier curves illustrating the different progression-free survival (PFS) of patients with various *EGFR* mutations. Kaplan-Meier curves comparing the PFS of (A) patients harboring point mutation G719 in exon 18, exon 19 deletions and point mutation L858R in exon 21; (B) patients harboring G719 and exon 19 deletions; (C) patients harboring G719 and L858R; (D) patients harboring exon 19 deletions and L858R.

**Figure S3**


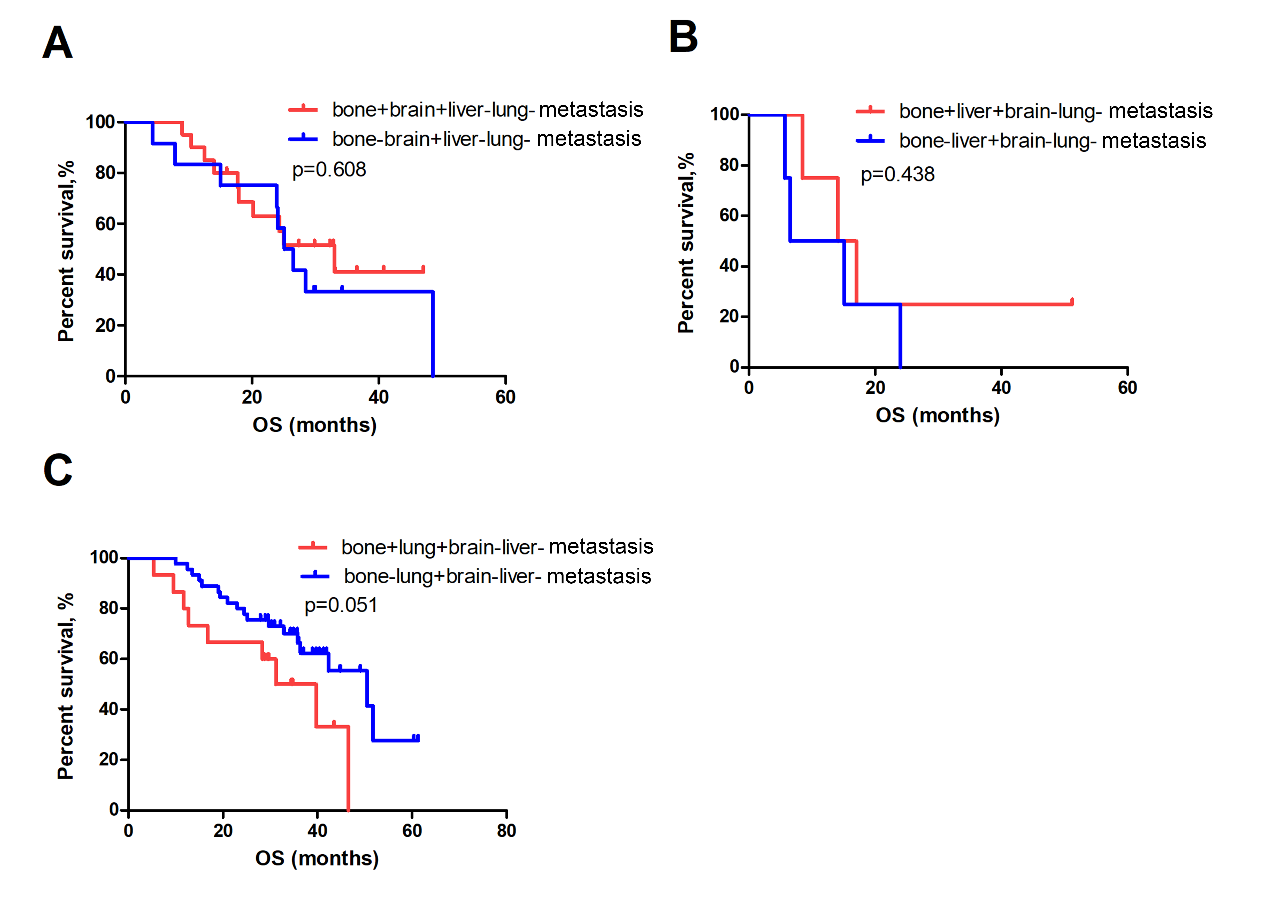


**Figure S3: Kaplan-Meier curves for overall survival (OS) of patients with or without bone metastasis in subgroups.** Kaplan-Meier curves comparing the OS of (A) patients with bone+ brain+ liver- lung- metastasis and bone- brain+ liver- lung- metastasis; (B)patients with bone+ liver+ brain- lung- metastasis and bone- liver+ brain- lung- metastasis; (C) patients with bone+ lung+ brain- liver- metastasis and bone- lung+ brain- liver- metastasis.
